# Supplementary material
Source: Springer Nature journal article supplement (https://www.springermedizin.de/resource/supplementary/12879_2009_843_MOESM1_ESM.pdf/9449908)
Supplement: MOESM1 [file 9449908]

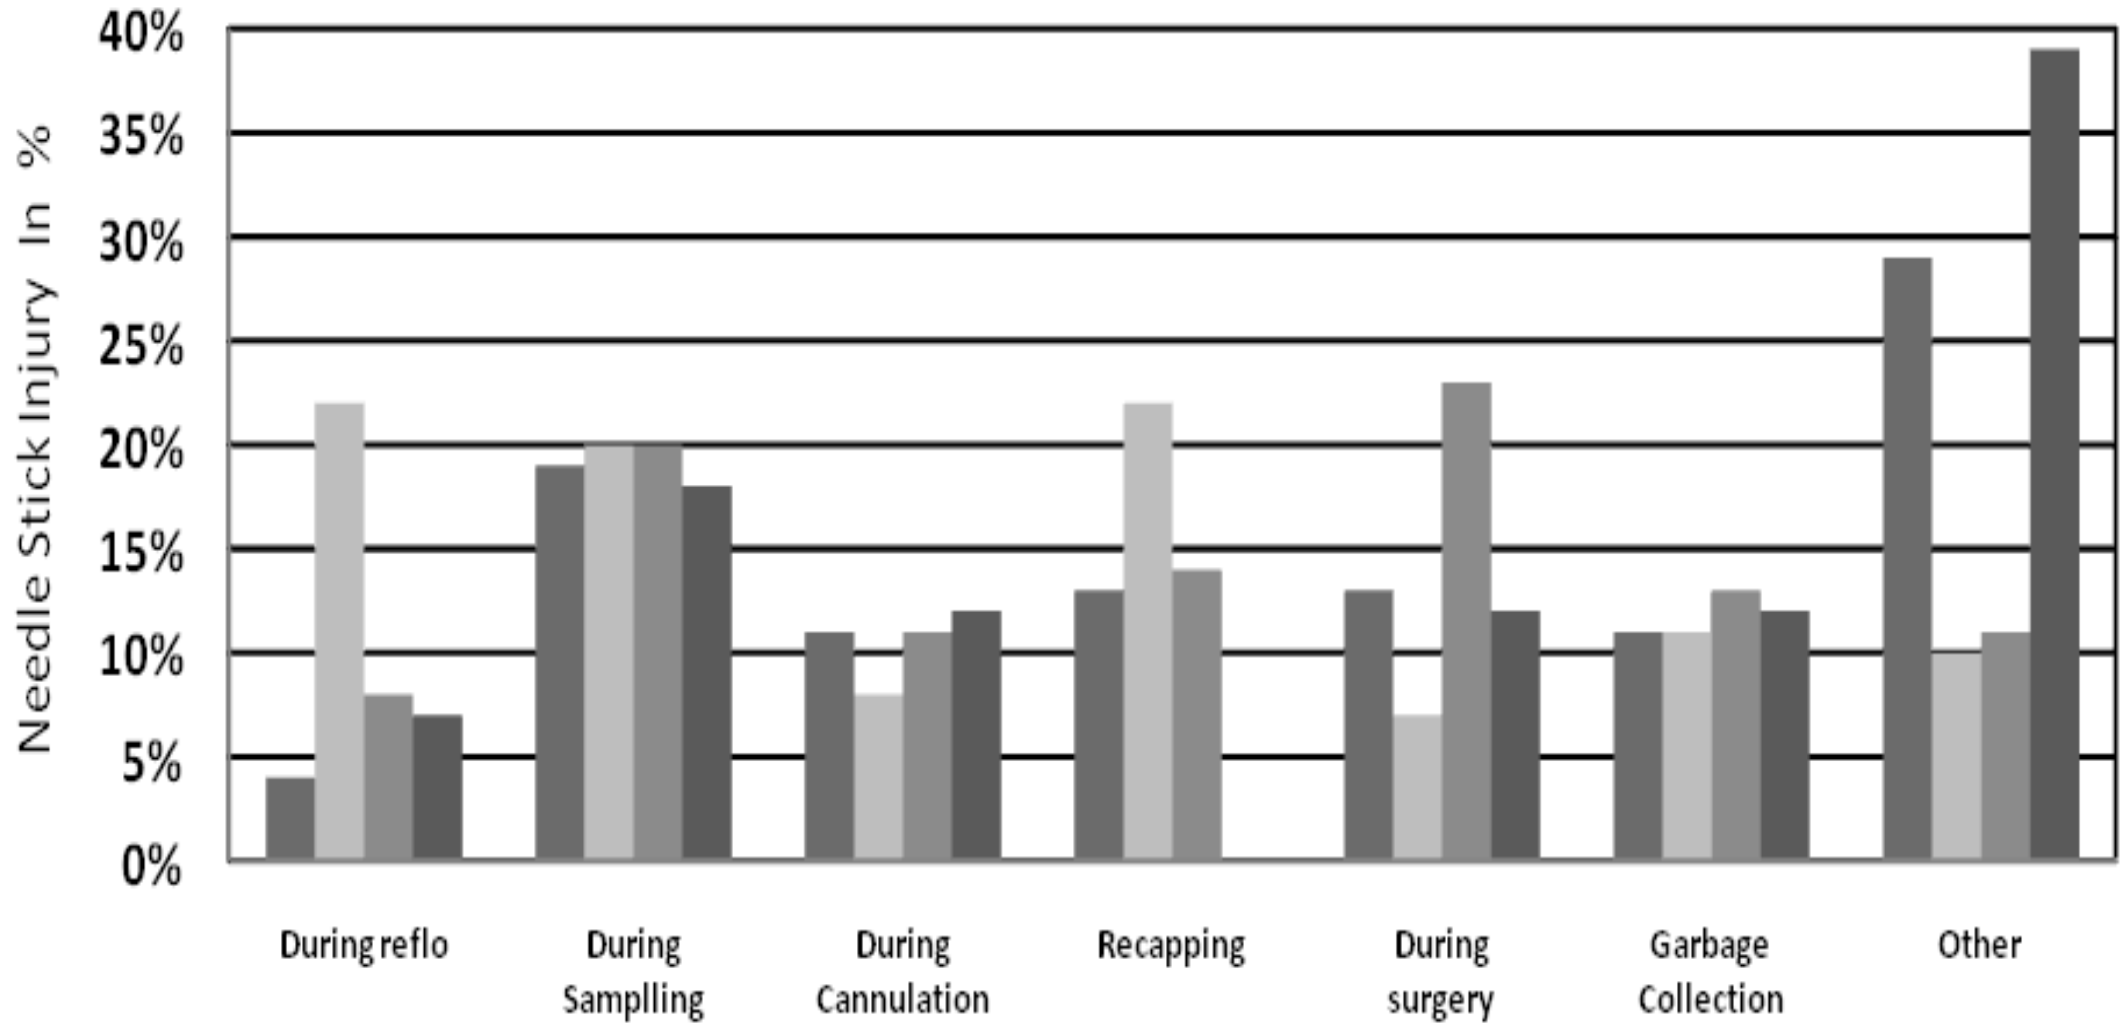

|             | During reflo | During Sampling | During Cannulation | Recapping | During surgery | Garbage Collection | Other |
|-------------|--------------|-----------------|--------------------|-----------|----------------|--------------------|-------|
| ■ 2002-2004 | 4%           | 19%             | 11%                | 13%       | 13%            | 11%                | 29%   |
| ■ 2005      | 22%          | 20%             | 8%                 | 22%       | 7%             | 11%                | 10%   |
| ■ 2006      | 8%           | 20%             | 11%                | 14%       | 23%            | 13%                | 11%   |
| ■ 2007      | 7%           | 18%             | 12%                | 0%        | 12%            | 12%                | 39%   |
